# Supplementary material for: Spatiotemporal microRNA profile in peripheral nerve regeneration: miR-138 targets vimentin and inhibits Schwann cell migration and proliferation
Source: PubMed Central journal article supplement — Neural Regen Res. 2018 Jul;13(7):1253–62. doi: 10.4103/1673-5374.235073 (PMC6065231; doi:10.4103/1673-5374.235073), 2018-07
Supplement: NRR-13-1253_Suppl2.pdf [file NRR-13-1253_Suppl2.pdf]

**Additional Figure 1**

Vector map for the Genecopoeia vector containing the 3'UTR of vimentin (Rat) (A). The sequence of the Genecopoeia vector containing the 3'UTR of vimentin (Rat) (B). Vector map for the Origene vector containing the 3'UTR of vimentin (Human) (C). The sequence of the Genecopoeia vector containing the 3'UTR of vimentin (Human) (D).

A)

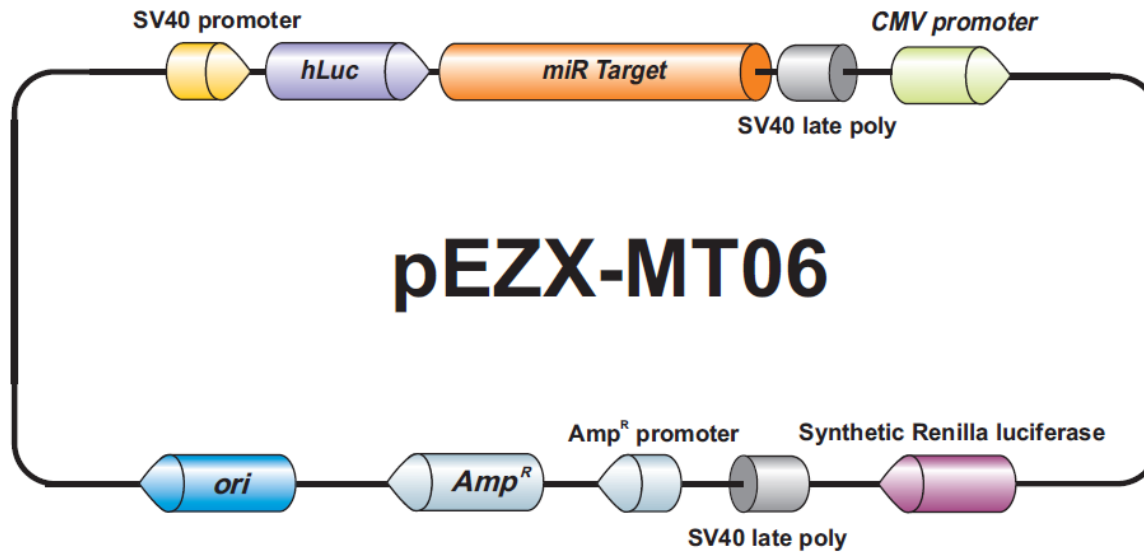

B)

GeneCopoeia pEZX-MT06/ 3'UTR Vimentin (Rat)

Blue=3'UTR of Vimentin, **Highlight**=miR-138-5p binding site

```
tcgagcagacatgataagatacattgatgagtttggacaaaccacaactagaatgcagtg
aaaaaaaaatgctttatgtgaaatttgtgatgctattgctttatgtgtaaccattataag
ctgcaataaacaagttaacaacaacaattgcattcattttatgtttcagggttcaggggga
ggtgtgggagggttttttaaagcaagtaaacctctacaaatgtggtaaaatcgataagga
```

tccatgctggttacataaacttacggtaaatggcccgctggctgaccgcccacgaccccc  
gccattgacgtcaataatgacgtatggtcccatagtaacgccaatagggactttccatt  
gacgtcaatgggtggagtatcttacggtaaaactgccacttggcagtacatcaagtgtatc  
atatgccaaagtacgccccctattgacgtcaatgacggtaaatggcccgctggcattatg  
cccagtacatgaccttatgggactttcctacttggcagtacatctacgtattagtcacg  
ctattaccatgggtgatgcggttttggcagtacatcaatgggctggatagcgggttgact  
cacggggatttccaagtctccacccattgacgtcaatgggagtttgttttggcaccaaa  
atcaacgggactttccaaaatgtcgtacaactccgccccattgacgcaaatgggcggt  
ggcgtgtacgggtgggaggtctatataagcagagctcgtttagtgaaccgtcagatcgct  
ggagacgccatccacgctgttttgacctccatagaagacacccgggaccgatccagcctcc  
ggactctagcctagatcttcggtaccatggcttccaaggtgtacgaccccgagcaacgca  
aacgcatgatcactgggctcagtggtgggctcgtcgaagcaaatgaacgtgctggact  
ccttcatcaactactatgattccgagaagcagccgagaacgccgtgatttttctgcatg  
gtaacgctgcctccagctacctgtggaggcagctcgtgcctcacatcgagcccgaggta  
gatgcatcatccctgatctgatcggaaatgggtaagtccggcaagagcgggaatggctcat  
atcgctcctggatcactacaagtacctcaccgcttggttcgagctgctgaaccttccaa  
agaaaatcatcttgtgggcccagactggggggcttgtctggcctttcactactcctacg  
agcaccaagacaagatcaaggccatcgtccatgctgagagtgctggtggacgtgatcgagt  
cctgggacgagtggtcctgacatcgaggaggatctcgccctgatcaagagcgaaggggag  
agaaaatgggtgcttgagaataacttcttcgctcgagaccatgctccaagcaagatcatgc  
ggaaactggagcctgaggagttcgctgcctacctggagccattcaaggagaagggcgagg  
ttagacggcctaccctctcctggcctcgcgagatccctctcgttaagggaggcaagcccg  
acgtcgtccagattgtccgcaactacaacgctaccttcggggccagcagcatctgccta  
agatgttcatcgagtcgacacctgggttcttttccaacgctattgtcgaggagtaaga  
agtccctaacaccgagttcgtgaaggtgaagggcctccacttcagccaggaggcagctc  
cagatgaaatgggtaagtacatcaagagcttcgtggagcgcgtgctgaagaacgagcagt  
aatctagagtggggcgccggccgcttcgagcagacatgataagatacatatgatgagtt  
tggacaaaccacaactagaatgcagtgaaaaaatgctttatgtgaaatttgtgatgc  
tattgctttatgtgaaccattataagctgcaataaacaagttaacaacaacaattgcat  
tcattttatgtttcagggttcagggggaggtgtgggaggttttttaaagcaagtaaacct  
ctacaaaatgtggtaaaaatcgataaggatccagggtggcacttttcggggaaatgtgcgcg  
aacccctatttgtttatcttctaaatacattcaaatatgtatccgctcatgagacaata  
accctgataaatgcttcaataatattgaaaaaggaagagatgagattcaacatttccg  
tgtcgccttattcccttttttgcggcattttgccttctgttttgcctcaccagaaac  
gctggtgaaagtaaaaagatgctgaagatcagttgggtgacagagtggttacatcgaact  
ggatctcaacagcggtaagatccttgagagtttcgccccgaagaacgttttccaatgat  
gagcacttttaaagttctgctatgtggcgcggtattatcccgtattgacgcccggcaaga  
gcaactcggctcgcgcatacactattctcagaatgacttgggtgagtaactcaccagtcac  
agaaaagcatcttacggatggcatgacagtaagagaattatgcagtgctgccataacct  
gagtgataaacactgcccgaacttacttctgacaacgatcggaggaccgaaggagctaac  
cgcttttttgcacaacatgggggatcatgtaactcgcttgatcgttgggaaccggagct

gaatgaagccataccaaacgacgagcgtgacaccacgatgcctgtagcaatggcaacaac  
gttgcgcaaactattaactggcgaactacttactctagcttcccggcaacaattaataga  
ctggatggaggcggataaaagttgcaggaccacttctgcgctcggcccttccggctggctg  
gtttattgctgataaatctggagccggtgagcgtgggtctcgcggtatcattgcagcact  
ggggccagatggtaagccctcccgtatcgtagtattctacacgacggggagtccaggcaac  
tatggatgaacgaaatagacagatcgctgagataggtgcctcactgattaagcattggta  
actgtcagaccaagtttactcatatatactttagattgatttaaaacttcatttttaatt  
taaaaggatctaggtgaagatcctttttgataatctcatgacaaaaatccctaacgtga  
gttttcggtccactgagcgtcagaccccgtagaaaagatcaaaggatcttcttgagatcc  
ttttttctgcgcgtaatctgctgcttgcaaacaaaaaaaccaccgctaccagcggtggt  
ttgtttgccggatcaagagctaccaactctttttccgaaggtaactggcttcagcagagc  
gcagataccaaatactgttcttctagtgtagccgtagttaggccaccacttcaagaactc  
tgtagcaccgcctacatacctcgctctgctaactcctgttaccagtggctgctgccagtgg  
cgataagt cgtgtcttaccgggttgactcaagacgatagttaccggataaggcgcagcg  
gtcgggctgaacgggggggttcgtgcacacagcccagcttgagcgaacgacctacaccga  
actgagatacctacagcgtgagctatgagaaagcgcacagcttcccgaaggagaaaggc  
ggacaggtatccggtaagcggcagggctcggaaacaggagagcgcacaggggagcttccagg  
gggaaacgcctggatctttatagtcctgtcgggtttcgccacctctgacttgagcgtcg  
atttttgtgatgctcgtcagggggcgaggcctatggaaaaacgccagcaacgcccctt  
tttacggttccctggccttttgctggccttttgctcacatggctcgacagatctgcgcagc  
accatggcctgaaataacctctgaaagaggaaacttggttaggtaccttctgaggcggaaa  
gaaccagctgtggaatgtgtgtcagttaggggtgtggaagtccccaggctcccagcagg  
cagaagtatgcaaagcatgcatctcaattagtcagcaaccagggtgtggaaagtccccagg  
ctccccagcaggcagaagtatgcaaagcatgcatctcaattagtcagcaaccatagtcct  
gcccctaactccgcccattcccgccctaactccgcccagttccgcccattctccgccc  
tggtgactaatTTTTTTTatTTTatgCagaggccgaggccgctcggcctctgagctatt  
ccagaagtagtgaggaggctTTTTTggaggcctaggctttgcaaaaagcttgattcttc  
tgacacaacagctctcgaacttaagctgcagaagtggctcgtgaggcactgggcaggtaag  
tatcaagggtacaagacagggttaaggagaccaatagaaaactgggcttgtcgagacagag  
aagactcttgcggttctgataggcacctattggctcttactgacatccactttgccttct  
ctccacaggtgtccactcccagttcaattacagctcttaaggctagagtaacttaatacga  
ctcactataggctagcggccaccatggccgatgctaagaacattaagaagggccctgctcc  
cttctaccctctggaggatggcaccgctggcgagcagctgcacaaggccatgaagaggt  
tgccctgggtgcttggcaccattgccttcaccgatgccacattgagggtggacatcaccta  
tgccgagtacttcgagatgtctgtgctgagcctggccgaggccatgaagaggtacggcctgaa  
caccaccaccgcctcgtgggtgctctgagaactctctgcagttcttcatgccagtgt  
ggcgccctgttcatcggagtggcctggccctgctaacgacatttacaacgagcgcga  
gctgctgaacagcatgggcatttctcagcctaccgtgggtgtcgtgtctaagaagggcct  
gcagaagatcctgaacgtgcagaagaagctgcctatcatccagaagatcatcatcatgga  
ctctaagaccgactaccagggttccagagcatgtacacattcgtgacatctcatctgcc  
tcttggttcaacgagtagcacttctgcccagagcttttcgacagggacaaaaccattgc

cctgatcatgaacagctctgggtctaccggcctgcctaagggcgtggccctgcctcatcg  
caccgcctgtgtgcgcttctctcacgcccgcgacccatatttcggcaaccagatcatccc  
cgacaccgctattctgagcgtgggtgccattccaccacggcttcggcatgttcaccaccct  
gggctacctgatctgcggtcttcgggtgggtgctgatgtaccgcttcgaggaggagctgtt  
cctgvcagcctgcaagactacaaaattcagctctgccctgctgggtgccaacctgttcag  
cttcttcgctaagagcaccctgatcgacaagtacgacctgtctaacctgcacgagattgc  
ctctggcggcgccccactgtctaaggaggtgggcaagccgtggccaagcgctttcatct  
gccaggcatccgccagggctacggcctgaccgagacaaccagcgccattctgattacccc  
agagggcgacgacaagcctggcgcctgggcaaggtgggtgccattcttcgaggccaaggt  
ggtggacctggacaccggcaagaccctgggagtgaaccagcgcggcgagctgtgtgtgcg  
cggccctatgattatgtccggctacgtgaataaccctgaggccacaaacgcctgatcga  
caaggacggctggctgcactctggcgacattgcctactgggacgaggacgagcacttctt  
catcgtggaccgcctgaagtctctgatcaagtacaagggtaccagggtggccccagccga  
gctggagtctatcctgctgcagcaccctaacattttcgacgcggagtgccggcctgcc  
cgacgacgatgcccggcgagctgcctgccgcctcgtcgtgctggaacacggcaagaccat  
gaccgagaaggagatcgtggactatgtggccagccaggtgacaaccgccaagaagctgcg  
cggcggagtggtgttcgtggacgaggtgcccaagggcctgaccggcaagctggacgcccg  
caagatccgcgagatcctgatcaaggctaagaaaggcggcaagatcgccgtgtaataatt  
ctagagtcggggcgcccGCGATCGCGAATTCCGTACG

AAACTGCACAGGCTCAGTGCAACGGCGCAGTACCAGCAAGAAGGAAAAAAAAAATCGTATC  
TTAGAAAAAAGAGCTTTCAAGTGCCTTTACTGCAGTTTTTCAGGAGCGCAAGATAGATCTG  
GGATAGAAAACGAGCTCAGCACATAACAACCTGACACCCCCAAAAGGCGTAGAAAAGGTTTA  
CAAAATAATCTAGTTTTACGAAGAAATCTTGTGCTAGAATACTTTTTAAAGTATTTTTGA  
ATACCATTAATACTGCTTTCTTTTTCCAGAAAATATCTGACCAACTTGTTACTGCTTCAA  
TAAAACCTCAGAAATACTCTTTCCGGTGTGTTATTTTACAATCTCGAGACTAGT

c)

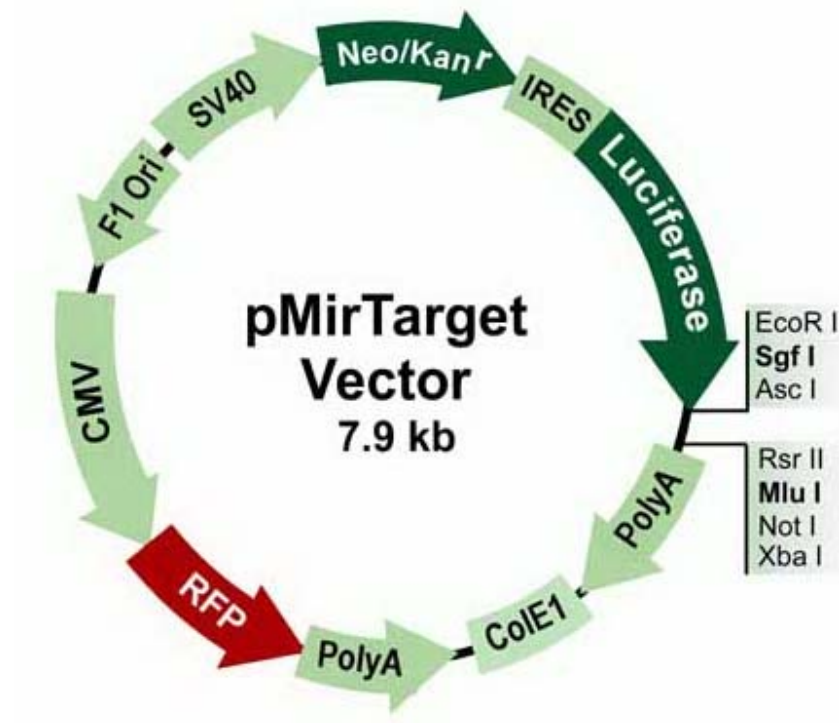

D)

Origene SC204483 3'UTR clone of Vimentin (Human)

Blue=3'UTR of Vimentin, **Highlight**=miR-138-5p binding site

```
AAAATTCGCGTTAAATTTTTGTTAAATCAGCTCATTTTTTAACCAATAGGCCGAAATCGGC AAAATCCCTTATAAATCAAAGAATAGACCGAGATAGGGTTGAGT
GTTGTTCCAGTTTGGAAACAAGAGTCCACTATTAAGAACGTGGACTCCAACGTCAAAGGGCGAAAAACCGTCTATCAGGGCGATGGCCCACTACGTGAACCATC
ACCCTAATCAAGTTTTTTGGGGTCGAGGTGCCGTAAGCACTAAATCGGAACCTAAAGGGAGCCCCGATTTAGAGCTTGACGGGGAAAGCCGGCGAACGTG
GCGAGAAAGGAAGGGAAGAAAGCGAAAGGAGCGGGCGCTAGGGCGCTGGCAAGTGTAGCGGTACGCTGCGCGTAACCACCACACCCGCCGCGCTTAATGCG
CCGCTACAGGGCGCGTCAGGTGGCACTTTTCGGGGAAATGTGCGCGGAACCCCTATTTGTTATTTTTCTAAATACATTCAAATATGTATCCGCTCATGAGACAAT
```

AACCTGATAAATGCTTCAATAATATTGAAAAAGGAAGAGTCCTGAGGCGGAAAGAACCAGCTGTGGAATGTGTGTCAGTTAGGGTGTGGAAAGTCCCAGGCT  
CCCCAGCAGGCAGAAGTATGCAAAGCATGCATCTCAATTAGTCAGCAACCAGGTGTGGAAAGTCCCAGGCTCCCAGCAGGCAGAAGTATGCAAAGCATGCAT  
CTCAATTAGTCAGCAACCATAGTCCCGCCCCTAACTCCGCCAGTTCGCCCATTCGCCCCATGGCTGACTAATTTTTTTATTTATGCAGAGGCCGAGGCCGC  
CTCGGCCTCTGAGCTATTCCAGAAGTAGTGAGGAGGCTTTTTGGAGGCCTAGGCTTTTGCAAAGATCGATCAAGAGACAGGATGAGGATCGTTTCGCATGATT  
GAACAAGATGGATTGCACGCAGGTTCTCCGGCCGCTTGGGTGGAGAGGCTATTGCGCTATGACTGGGCACAACAGACAATCGGCTGCTCTGATGCCGCCGTGT  
CCGGCTGTGAGCGCAGGGGCGCCCGTTCTTTTTGTCAAGACCGACCTGTCCGGTGCCTGAATGAACTGCAAGACGAGGCAGCGCGGCTATCGTGGCTGGCCA  
CGACGGGCGTTCCTTGCGCAGCTGTGCTCGACGTTGCACTGAAGCGGGAAGGGACTGGCTGCTATTGGGCGAAGTGCCGGGGCAGGATCTCCTGTCATCTCAC  
CTTGCTCCTGCCGAGAAAGTATCCATCATGGCTGATGCAATGCGGCGGCTGCATACGCTTGATCCGGCTACCTGCCATTGACCACCAAGCGAAACATCGCATC  
GAGCGAGCACGTACTCGGATGGAAGCCGGTCTTGTGCATCAGGATGATCTGGACGAAGAGCATCAGGGGCTCGCGCCAGCCGAAGTTCGCCAGGCTCAAGG  
CGAGCATGCCCGACGGCGAGGATCTCGTCGTGACCCATGGCGATGCCTGCTTGCCGAATATCATGGTGGAAAATGGCCGTTTTCTGGATTCATCGACTGTGGCC  
GGCTGGGTATGGCGGATCGCTATCAGGACATAGCGTTGGCTACCCGTGATATTGCTGAAGAGCTTGGCGGCGAATGGGCTGACCGCTTCCTCGTGCTTTACGGT  
ATCGCCGCTCCCGATTGCGCAGCGCATCGCCTTCTATCGCCTTCTTGACGAGTTCCTTCTGAGCGGGACTCTGGGGTTCGATTCCGCCCCCCCCCTAACGTTACTGGC  
CGAAGCCGCTTGAATAAGGCCGGTGTGCGTTTGTCTATATGTTATTTTCCACCATATTGCCGCTTTTTGGCAATGTGAGGGCCCGGAAACCTGGCCCTGTCTTCT  
TGACGAGCATTCTAGGGTCTTTCCCTCTCGCCAAAGGAATGCAAGGTCTGTTGAATGTCGTGAAGGAAGCAGTTCCTCTGGAAGCTTCTTGAAGACAAACAA  
CGTCTGTAGCGACCCTTTGAGGCAGCGGAACCCCCACCTGGCGACAGGTGCCTCTGCGGCCAAAAGCCACGTGTATAAGATACACCTGCAAAGGCGGCACAA  
CCCCAGTGCCACGTTGTGAGTTGGATAGTTGTGAAAAGAGTCAAATGGCTCTCCTCAAGCGTATTCAACAAGGGGCTGAAGGATGCCAGAAGGTACCCCATTG  
TATGGGATCTGATCTGGGGCCTCGGTGCACATGCTTTACATGTGTTTAGTCGAGGTTAAAAAACGTCTAGGCCCCCGAACACGGGGACGTGGTTTTCTTTG  
AAAAACAGATGATAATATGGCCACAACAATTGATGGAAGACGCCAAAAACATAAAGAAAGGCCAGCGCCATTCTACCCACTCGAAGACGGGACCGCCGGCG  
AGCAGCTGCACAAAGCCATGAAGCGCTACGCCCTGGTGGCCGGCACCATCGCCTTACCGACGCACATATCGAGGTGGACATTACCTACGCCGAGTACTTCGAGA  
TGAGCGTTCGGCTGGCAGAAGCTATGAAGCGCTATGGGCTGAATACAAACCATCGGATCGTGGTGTGACGCGAGAATAGCTTGCAGTTCCTCATGCCCGTGTG  
GGTGCCCTGTTTCATCGGTGTGGCTGTGGCCCCAGTAACGACATCTACAACGAGCGCGAGCTGCTGAACAGCATGGGCATCAGCCAGCCCACCGTCTGATTCTG  
GAGCAAGAAAGGGCTGAAAAGATCCTCAACGTGAAAAGAAGCTACCGATCATACAAAAGATCATCATCATGGATAGCAAGACCGACTACCAGGGCTTCCAAA  
GCATGTACACCTTCGTGACTTCCATTTGCCACCCGGCTTCAACGAGTACGACTTCGTGCCCGAGAGCTTCGACCGGGACAAAACCATCGCCCTGATCATGAACAG  
TAGTGGCAGTACCGATTGCCAAGGGCGTAGCCCTACCGCACCACCGCTTGTGTCCGATTGAGTCATGCCCGGACCCCATCTTCGGCAACCAGATCATCCC  
CGACACCGCTATCCTCAGCGTGGTGCCATTTACCACGGCTTCGGCATGTTACCACGCTGGGCTACTTGATCTGCGGCTTTCGGGTGCTGCTCATGTACCGCTC  
GAGGAGGAGCTATTCTTGCAGCTTGAAGACTATAAGATTCAATCTGCCCTGCTGGTGGCCACACTATTTAGCTTCTTCGCTAAGAGCACTCTCATCGACAAGT  
ACGACCTAAGCAACTTGACAGGATCGCCAGCGGGCGGGGCGCCGCTCAGCAAGGAGGTAGGTGAGGCCGTGGCCAAACGCTTCCACCTACCAGGCATCCGCCA  
GGGCTACGGCCTGACAGAAACAACCAGCGCCATTCTGATACCCCCGAAGGGGACGACAAGCCTGGCGCAGTAGGCAAGGTGGTGCCTTCTTCGAGGCTAAG  
GTGGTGGACTTGACACCGGTAAGACTGAGGCTGTAACCAGCGCGGCGAGCTGTGCGTCCGTGGCCCCATGATCATGAGCGGCTACGTTAACACCCCGAGG  
CTACAAACGCTCTCATCGACAAGGACGGCTGGCTGCACAGCGGCGACATCGCCTACTGGGACGAGGACGAGCACTTCTTCATCGTGGACCGGCTGAAGAGCCTG

ATCAAATACAAGGGCTACCAGGTAGCCCCAGCCGAAGTGGAGAGCATCCTGCTGCAACACCCCAACATCTTCGACGCCGGGGTCGCCGGCCTGCCGACGACGA  
TGCCGGCGAGCTGCCGCCGAGTCGTCTGCTGGAACACGGTAAAACCATGACCGAGAAGGAGATCGTGGACTATGTGGCCAGCCAGGTTACAACCGCCAAG  
AAGCTGCGCGGTGGTGTGTTCTGTTGACGAGGTGCCTAAAGGACTGACCGGCAAGTTGGACGCCGCAAGATCCGCGAGATTCTCATTAAAGCCAAGAAGG  
GCGGAAAGATCGCCGTGAACAATTGGCAGAGCTCAGAATTCAAGCGATCGCCTTCTCAGCATCACGATGACCTTGAATAA

AAATTGCACACACTCAGTGCAGCAATATATTACCAGCAAGAATAAAAAAGAAATCCATATCTTAAAGAAACAGCTTTCAAGTGCCTTTCTGCAGTTTTTCAGGAGC  
GCAAGATAGATTTGGAATAGGAATAAGCTCTAGTTCTTAAACACCGACTCCTACAAGATTTAGAAAAAGTTTACAACATAATCTAGTTTACAGAAAAATCTTG  
TGCTAGAATACTTTTTAAAGGTATTTTGAATACCATTAAACTGCTTTTTTTTTCCAGCAAGTATCCAACCAACTGGTTCTGCTTCAA

ACGCGTAAGCGGCCGCGGCATCTAGATTGAAAGAAAATGACCGACCAAGCGACGCCAACCTGCCATCACGAGATTTGATTCCACCGCCGCCTTCTATGAAAG  
GTTGGGCTTCGGAATCGTTTTCCGGGACGCCGGCTGGATGATCCTCCAGCGCGGGGATCTCATGCTGGAGTTCTTCGCCACCCTAGGGGGAGGCTAACTGAAA  
CACGGAAGGAGACAATACCGGAAGGAACCCGCGCTATGACGGCAATAAAAAGACAGAATAAAACGCACGGTGTGGGTGCTTTGTTTATAAACGCGGGGTTCCG  
GTCCCAGGGCTGGCACTCTGTCGATACCCACCGAGACCCATTGGGGCCAATACGCCCGCTTTCTTCTTTTCCCACCCACCCCAAGTTCGGGTGAAGGC  
CCAGGGCTCGCAGCCAACGTCGGGGCGGCAGGCCCTGCCATAGCCTCAGGTTACTCATATATACTTTAGATTGATTTAAACTTCATTTTTAATTTAAAGGATCT  
AGGTGAAGATCCTTTTTGATAATCTCATGACCAAAATCCCTAACGTGAGTTTTGTTCCACTGAGCGTCAGACCCGTAGAAAAGATCAAAGGATCTTCTTGAGA  
TCCTTTTTTCTGCGCTAATCTGCTGCTTCAAACAATAAAACACCGCTACCAGCGGTGGTTTGTGGCCGATCAAGAGCTACCAACTCTTTTTCCGAAGGTAA  
CTGGCTTCAGCAGAGCGCAGATACCAAACTGTTCTTCTAGTGTAGCCGTAGTTAGGCCACCACTTCAAGAACTCTGTAGCACCGCTACATACCTCGCTCTGCT  
AATCTGTTACCAAGTGGCTGCTGCCAGTGGCGATAAGTCGTGTCTTACCGGGTTGGACTCAAGACGATAGTTACCGGATAAGGCGCAGCGGTGCGGGCTGAACGG  
GGGGTTCGTGCACACAGCCCAGCTTGGAGCGAACGACCTACACCGAACTGAGATACCTACAGCGTGAGCTATGAGAAAGCGCCACGCTTCCGAAGGGAGAAA  
GGCGGACAGGTATCCGGTAAGCGGCAGGGTCCGAACAGGAGAGCGCACGAGGGAGCTTCCAGGGGGAAACGCCTGGTATCTTTATAGTCTGTGCGGGTTTCGC  
CACCTCTGACTTGAGCGTCGATTTTTGTGATGCTCGTCAGGGGGGCGGAGCCTATGGAAAAACGCCAGCAACGCGGCCTTTTTACGGTTCCTGGCCTTTTGTGG  
CCTTTTGTCTACATGTTCTTCTGCGTTATCCCCTGATTCTGTGGATAACCGTATTACCGCCTTTGAGTGTAGCTGATACCGCTCGCCGCTGGCCGCGTACCCAATC  
AACAGGCATCTACTGAGTGGACCAACGCATGAGAGGACAGTGCCAAGCAAGCAACTCAAATGTCCCACCGGTTGGGCATGGCCAGGTAGCCTATGCTGTGTCT  
GGACGTCTCTGCTGGTATAGTTATTTTAAATCAGAAGGACAGGGAAAGGGAGCAGTGGTTCACGCCTGTAATCCCAGCAATTTGGGAGGCCAAGGTGGGTAG  
ATCACCTGAGATTAGGAGTTGGAGACCAGCCTGGCCAATATGGTGAACCCCGTCTTACCAAAAAAACAAAAATTAGCTGAGCCTGGTCATGCATGCCTGGAAT  
CCCAACAACCTCGGAGGGCTGAGGCAGGAGAATCGCTTGAACCCAGGAGGCGGAGATTGCAGTGTAGCAAGATTGTGCCACTGCACTCCAGCTTGGTCCCAATA  
GACCCCGCAGGCCCTACAGGTTGTCTTCCCAACTTGCCCCTGTCCATACCACCCCTCCACCCATAATATTATAGAAGGACACCTAGTCAGACAAAATGATGC  
AACTTAATTTTATTAGGACAAGGCTGGTGGCACTGGAGTGGCAACTCCAGGGCCAGGAGAGGCACTGGGGAGGGGTACAGGGATGCCACCCGGGATCTGT  
TCAGGAAACAGCTATGACCGCGGCCGCGCTTTAAACCTTATCGTCGTCATCCTTGTAAATCCAGGATATCATTTGCTGCCAGATCCTTCTGAGATGAGTTTCTGC  
TCGAGGGACGCGATCTGTGCCCCAGTTTGTAGGGAGGTGCGAGTACTTGGCCACAGCCATCTCGTGTGCTCGACGTAGGTCTTTGTGGCCTCCTGATTCT

TTCCAGTCTGTGGTCCACGAAGTGGAAGCCGGGCATCTTGAGGTTCTTAGCGGGTTTCTTGGATCTGTATGTGGTCTTGAAGGAGCAGTGCAGGTAGCCCCGCC  
CACGAGCTTCAGGGCCATCTGGCTGTGGCCTCTCAGGCCCGCTCAGCGGGGTACAGCATCTCGGTGTTGGCCTCCCAGCCGCGTGTCTTCTTCTGCATCACAGG  
GCCGTTGGATGGGAAGTTCACCCCGTTGATCTTGACGTTGTAGATGATGCAGCCGTTCTGGAAGCTGGTGTCTGGGTAGCGGTCAGCACGCCCCGTTCTCGTA  
TGTGGTGATTCTCTCCCATGTGAAGCCCTCAGGGAAGGACTGCTTAAAGAAGTCGGGGATGCCCTGGGTGTGGTTGATGAAGGCTTTGCTGCCGTACATGAAGC  
TGGTAGCCAGGATGTCTGAAGGCGAAGGGGAGAGGGCCCGCTCGACCACCTTGATCTTCATGGTCTGGGTGCCCTCGTAGGGCTTGCCTTCGCCCTCGGATGTG  
CACTTGAAGTGGTGGTTGTTACGGTGCCCTCCATGTACAGCTTCATGTGCATGTTCTCCTTGATCAGCTCGCTCATGGCGAACGCGGCGCAGATCTCCTCGGTAC  
TGGATCCAGTCGACGATTCCCGGCCGCCCTATAGTGAGTCGTATTACAAAATTCTGACGGTTCACTAAACGAGCTCTGCTTATATAGACCTCCCACCGTACACGCC  
TACCGCCATTTGCGTCAACGGGGCGGGGTTATTACGACATTTTGGAAAAGTCCCGTTGATTTTGGTGCCAAAACAAACTCCCATTGACGTCAATGGGGTGGAGAC  
TTGAAAATCCCGTGAGTCAAACCGCTATCCACGCCATTGGTGTACTGCCAAAACCGCATCACCATGGTAATAGCGATGACTAATACGTAGATGTACTGCCAAG  
TAGGAAAGTCCCGTAAGGTCATGTACTGGGCATAATGCCAGGCGGGCCATTTACCGTCATTGACGTCAATAGGGGGCGGACTTGGCATATGATACACTTGATGT  
ACTGCCAAGTGGGCAGTTTACCGTAAATACTCCACCCATTGACGTCAATGGAAAAGTCCCTATTGGCGTACTATGGGAACATACGTCATTATTGACGTCAATGGGC  
GGGGGTCGTTGGGCGGTACGCCAGGCGGGCCATTTACCGTAAGTTATGTAACGCGGAACTCCATATATGGGCTATGAACTAATGACCCCGTAATTGATTACTATT  
AATAACTAGTCAATAATCAATGTCAACATGGCGGTCATATTGGACATGAGCCAATATAAATGTACATATTATGATATAGATACAACGTATGCAATGGCCAATAGCC  
AATATTGATTTATGCTATATAACCAATGACTAATATGGCTAATTGCCAATATTGATTCAATGTATAGATCAGCTTGGCACTGGCCGTCGTTTTACAACGTCGTGACT  
GGGAAAACCCTGGCGTTACCCAATTAATCGCCTTGACGACATCCCCCTTCGCCAGCTGGCGTAATAGCGAAGAGGCCCGCACCGATCGCCCTTCCAACAGT  
TGCGCAGCCTGAATGGCGAATGGAAAATTGTAAGCGTTAATATTTTGT
